# Supplementary material for: Supracolloidal chains of patchy micelles of diblock copolymers with in situ synthesized nanoparticles
Source: Royal Society of Chemistry journal article supplement (doi:10.1039/c7sm01497j), 2017-01-01
Supplement: c7sm01497j1.pdf [file c7sm01497j1.pdf]

## Supporting Information

# Supracolloidal Chains of Patchy Micelles of Diblock Copolymers with In-situ Synthesized Nanoparticles

*Sukwoo Jang, Kyungtae Kim, Jonghyuk Jeon, Donghwi Kang, and Byeong-Hyeok Sohn\**

Department of Chemistry, Seoul National University, Seoul 08826, Republic of Korea

\*Corresponding Author. E-mail address: [bhsohn@snu.ac.kr](mailto:bhsohn@snu.ac.kr)

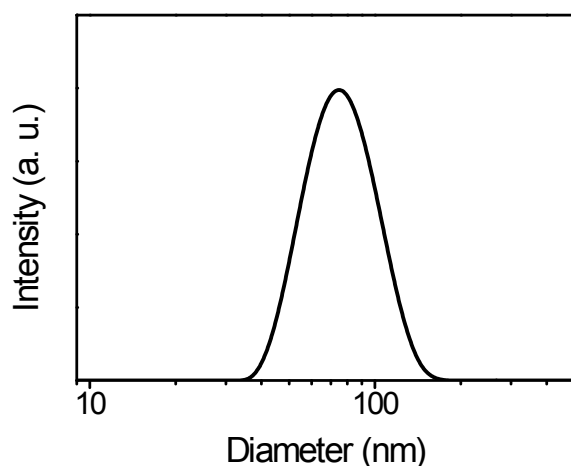

**Figure S1.** Dynamic light scattering result of spherical PS-*b*-P4VP micelles.

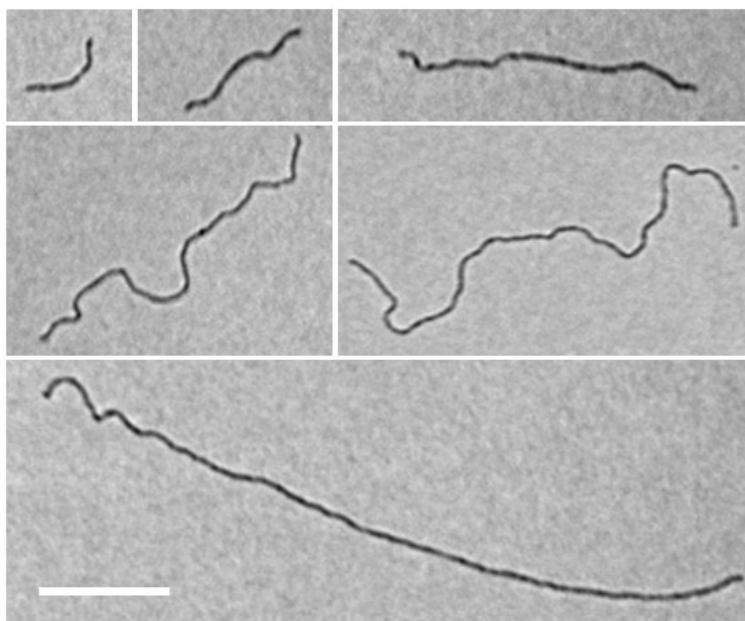

**Figure S2.** TEM images of supracolloidal chains with various lengths. The scale bar is 2  $\mu\text{m}$ .

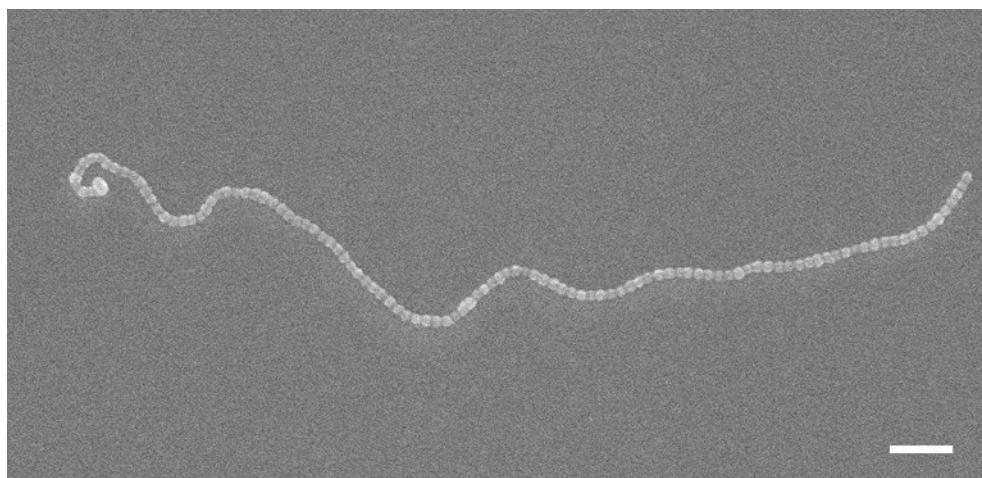

**Figure S3.** SEM image of a supercolloidal chain on a solid substrate. The scale bar is 200 nm.

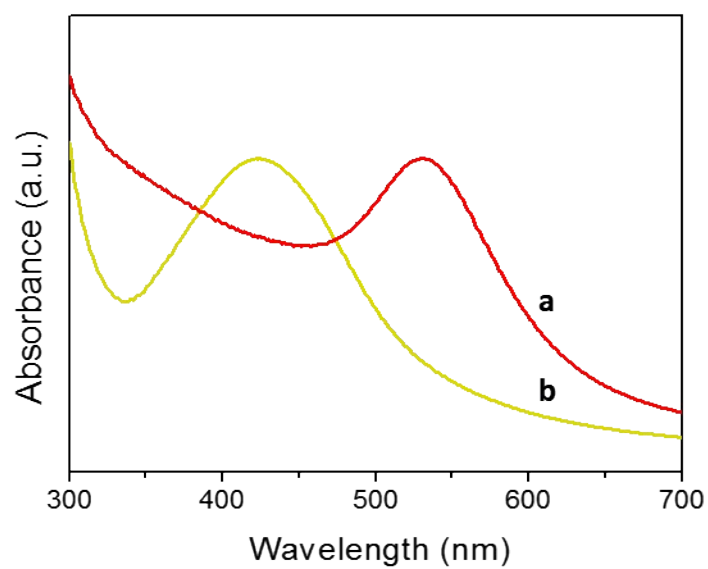

**Figure S4.** UV-Vis spectra of patchy micelles with NPs: (a) Au NPs; (b) Ag NPs.
